# Supplementary material for: A Genome-Wide Functional Screen Identifies Enhancer and Protective Genes for Amyloid Beta-Peptide Toxicity
Source: MDPI journal article supplement (doi:10.3390/ijms24021278), 2023-01-09
Supplement: s1 [file s1]

## SUPPLEMENTARY MATERIAL

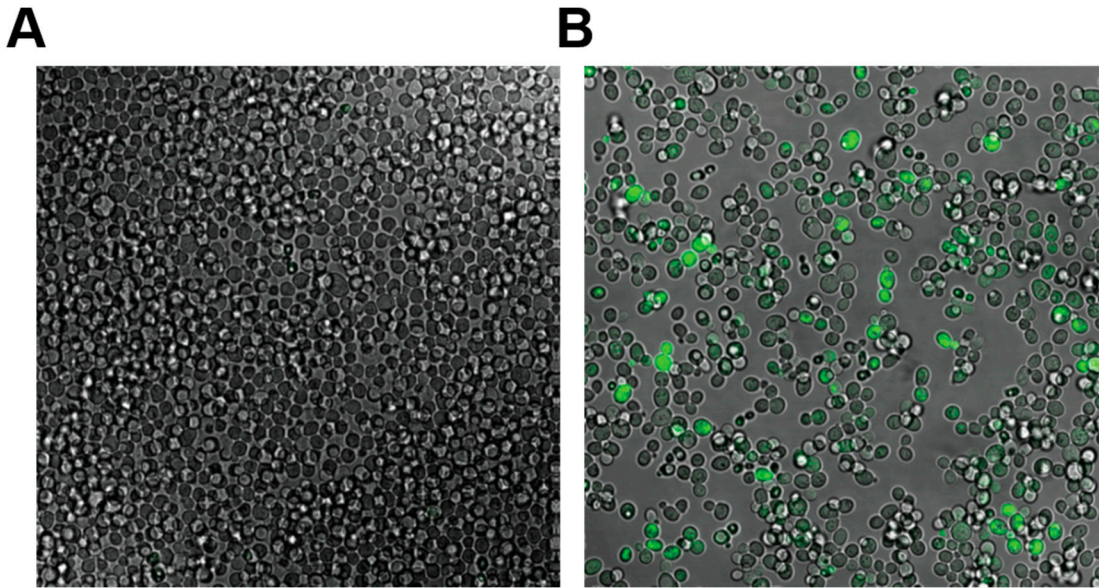

**Figure S1.** Induction of A $\beta$ <sub>1-42</sub> expression in yeast. Representative confocal images of yeast transformed with the A $\beta$ <sub>1-42</sub> construct and cultured for 6 h at 30°C in (A) non-inducing (glucose) and (B) inducing (galactose) medium.

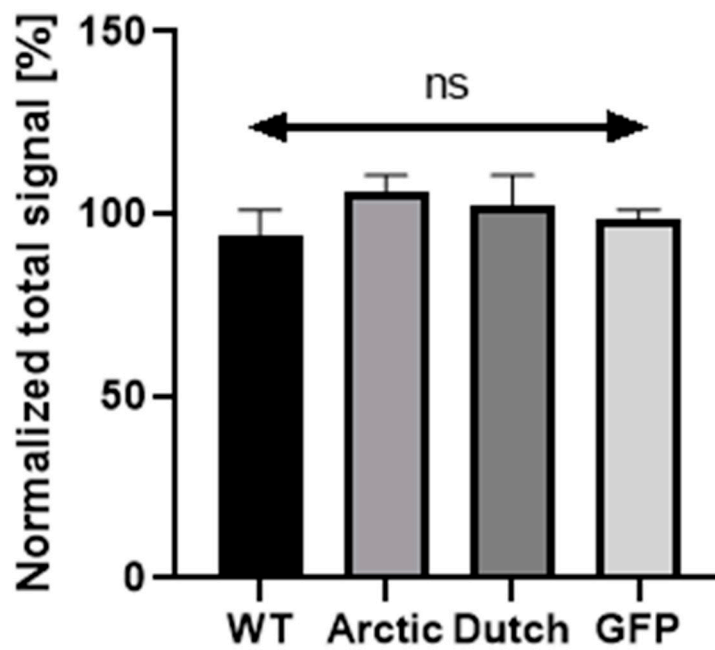

**Figure S2.** Western blots, as shown in Figure 2B, from different experiments were quantified to analyze the expression levels of A $\beta$ <sub>1-42</sub>-GFP using an anti-GFP antibody. All GFP bands were quantified for each condition and shown in the graph. Data are the mean  $\pm$  SEM of 3-4 independent experiments. non-significant (ns) vs the respective conditions by ANOVA plus Bonferroni as post-hoc test.

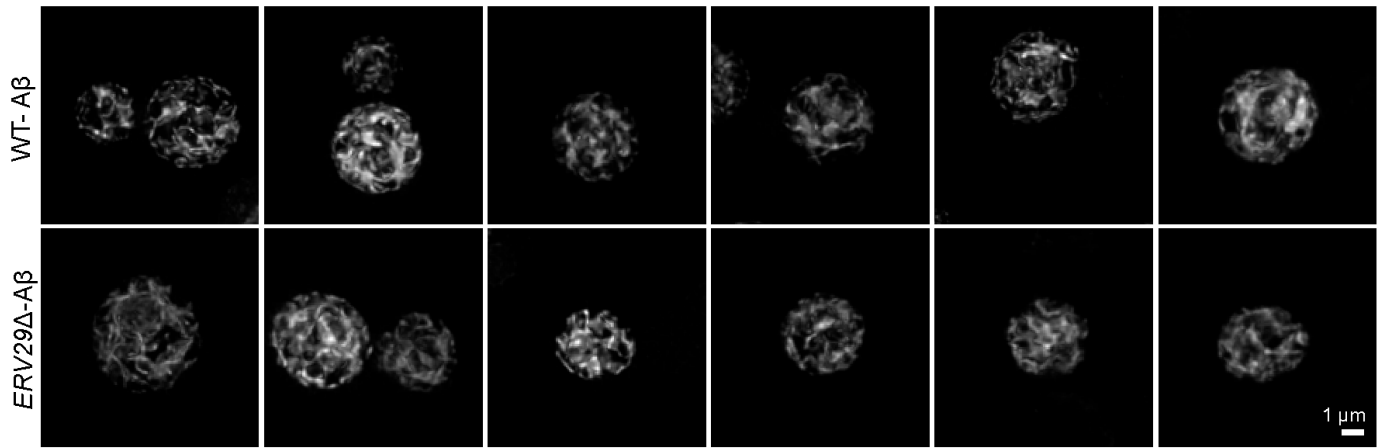

**Figure S3.** Projections of super-resolution microscopy images showing the subcellular localization of Aβ<sub>1-42</sub>-GFP in the WT and *erv29Δ* strains (yeasts lacking *SURF4*) transformed with the Aβ<sub>1-42</sub>-GFP construct and grown in inducing medium for 15 h at 30°C.

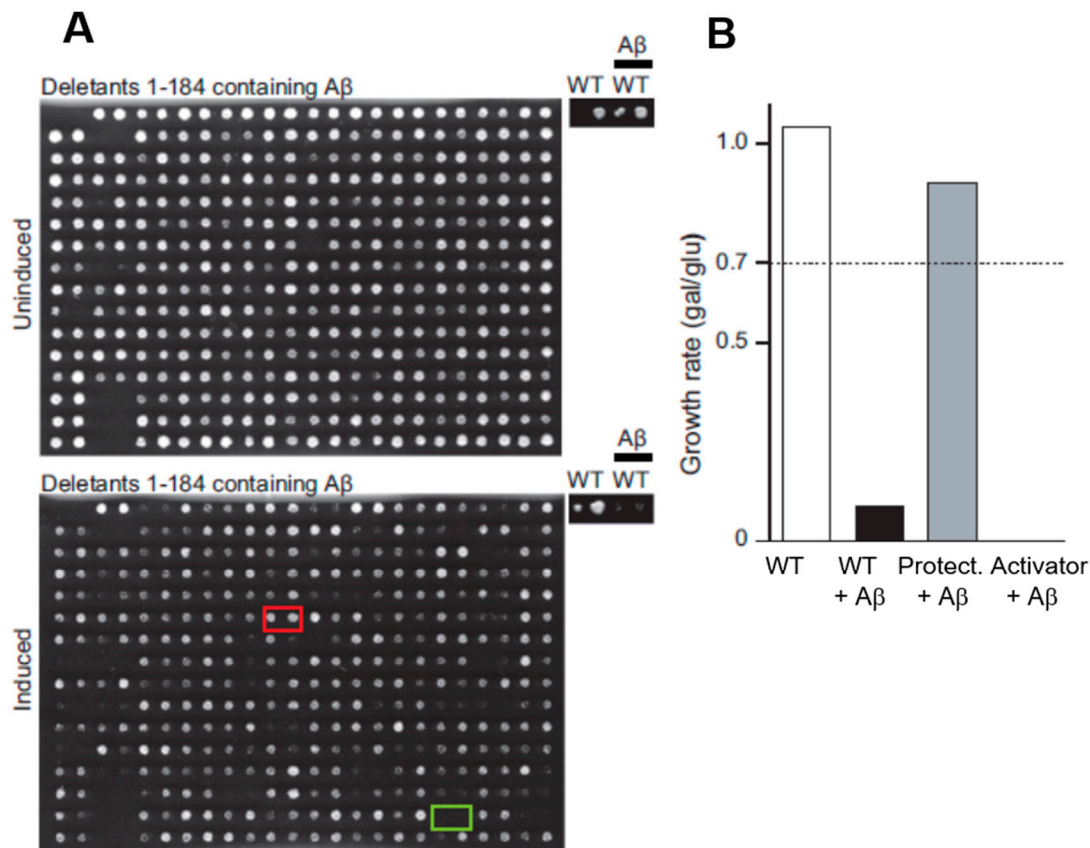

**Figure S4.** Screen plate for the first 184 knock-out strains assessed. **(A)** The strain containing A $\beta$ <sub>1-42</sub> construct was mated with a library with of 5,154 gene knock-out strains. Resultant haploid cells were spotted twice on medium containing galactose (induced) or glucose (uninduced) and cultured for 3, 4 and 5 days at 30 °C. Image of the uninduced and the induced plate, at day 4, of the first 184 knock-outs containing the A $\beta$ <sub>1-42</sub> construct (left) and the plate of the WT strain containing or not the A $\beta$ <sub>1-42</sub> construct (right). An example of a knock-out that reverts A $\beta$ <sub>1-42</sub> toxicity (red) and a knock-out that enhances A $\beta$ <sub>1-42</sub> toxicity (green) is indicated. **(B)** Growth rate quantification of the WT strain containing or not A $\beta$ <sub>1-42</sub> and an example of a revertant and an enhancer knock-out strain of A $\beta$ <sub>1-42</sub> toxicity. The minimum growth rate set for the protective is at 0.7 whereas the maximum growth rate set for the enhancers is at 0, as indicated.

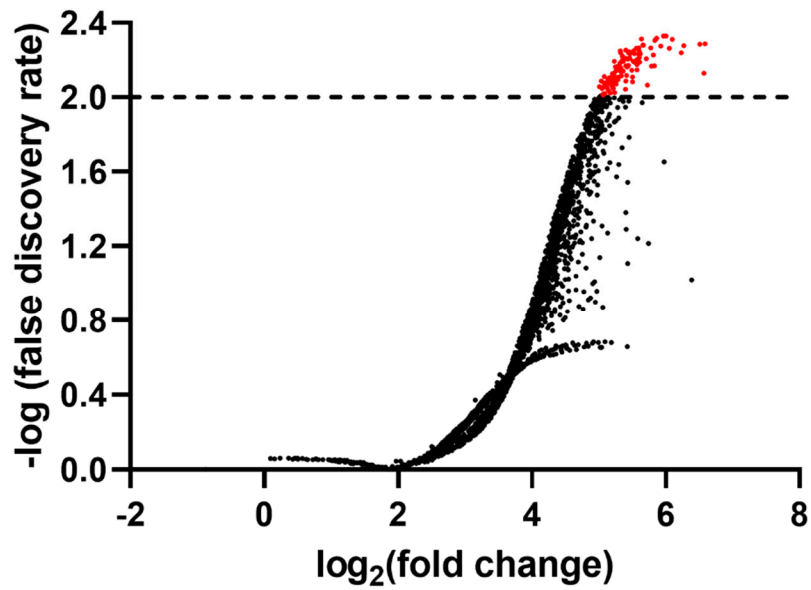

**Figure S5.** Identification of enhancers of A $\beta$ <sub>1-42</sub> toxicity by volcano plot. Data from day 3 was used for identification of the enhancers of A $\beta$ <sub>1-42</sub> toxicity. Statistical analysis was performed comparing each KO strain vs a non-KO using a non-parametric ANOVA with an Uncorrected Dunn's test posthoc test. In red are the strains with  $p < 0.001$ .

**Table S1.** Enhancer genes of amyloid toxicity in yeast and their mammalian orthologues

| Systematic name | Yeast gene    | Function                                                                                                               | Mammalian gene name                              |
|-----------------|---------------|------------------------------------------------------------------------------------------------------------------------|--------------------------------------------------|
| YAL011W         | <i>SWC3</i>   | SWr Complex, protein of unknown function                                                                               | w/o orthologue                                   |
| YAL021C         | <i>CCR4</i>   | Carbon Catabolite Repression, component of the CCR4-NOT transcriptional complex                                        | <i>ANGEL1, LOC729530, CCRN4L, ANGEL2, 2'-PDE</i> |
| YAL040C         | <i>CLN3</i>   | CycLiN, g1 cyclin involved in cell cycle progression                                                                   | <i>CCNB2, CNTD2</i>                              |
| YAL044C         | <i>GCV3</i>   | GlyCine cleavage, h subunit of the mitochondrial glycine decarboxylase complex                                         | <i>LOC729080</i>                                 |
| YAL060W         | <i>BDH1</i>   | Butanediol DeHydrogenase, NAD-dependent                                                                                | <i>SORD</i>                                      |
| YBL071C-B       | unass.        | Putative protein of unknown function                                                                                   | w/o orthologue                                   |
| YBR048W         | <i>RPS11B</i> | Ribosomal Protein of the Small subunit, protein component of the small (40S) ribosomal subunit                         | <i>RPS11</i>                                     |
| YBR058C-A       | <i>TSC3</i>   | Temperature-sensitive Suppressors of Csg2 mutants, protein that stimulates the activity of serine palmitoyltransferase | w/o orthologue                                   |
| YBR066C         | <i>NRG2</i>   | Negative Regulator of Glucose-controlled genes, transcriptional repressor                                              | <i>ZBTB16, KLF14, KLF7, KLF5,</i>                |
| YBR181C         | <i>RPS6B</i>  | Ribosomal Protein of the Small subunit, protein component of the small (40S) ribosomal subunit                         | <i>RPS6</i>                                      |
| YBR186W         | <i>PCH2</i>   | Pachytene Checkpoint, hexameric ring ATPase that remodels chromosome axis protein Hop1p                                | <i>TRIP13</i>                                    |
| YBR206W         | unass.        | Dubious open reading frame                                                                                             | w/o orthologue                                   |
| YBR214W         | <i>SDS24</i>  | Homolog of <i>S. pombe</i> SDS23, protein involved in cell separation during budding                                   | w/o orthologue                                   |
| YBR215W         | <i>HPC2</i>   | Histone Periodic Control, subunit of the HIR complex                                                                   | w/o orthologue                                   |
| YBR246W         | <i>RRT2</i>   | Regulator of rDNA Transcription, methyltransferase performing penultimate step of diphthamide biosynthesis             | <i>DPH7</i>                                      |
| YBR266C         | <i>SLM6</i>   | Synthetic Lethal with Mss4, protein with a potential role in actin cytoskeleton organization                           | w/o orthologue                                   |
| YBR267W         | <i>REI1</i>   | REquired for Isotropic bud growth, cytoplasmic pre-60S factor                                                          | <i>ZNF622</i>                                    |
| YBR291C         | <i>CTP1</i>   | Citrate Transport Protein, mitochondrial inner membrane citrate transporter                                            | <i>SLC25A1</i>                                   |
| YCR020W-B       | <i>HTL1</i>   | High-Temperature Lethal, component of the RSC chromatin remodeling complex                                             | w/o orthologue                                   |

|           |               |                                                                                                             |                               |
|-----------|---------------|-------------------------------------------------------------------------------------------------------------|-------------------------------|
| YCR061W   | <i>TVS1</i>   | Protein of unknown function                                                                                 | w/o orthologue                |
| YCR094W   | <i>CDC50</i>  | Cell Division Cycle, endosomal protein that interacts with phospholipid flippase Drs2p                      | <i>TMEM30A, TMEM30B</i>       |
| YDL009C   | unass.        | Protein of unknown function                                                                                 | w/o orthologue                |
| YDL063C   | <i>SYO1</i>   | SYnchronized impOrt or SYmpOrtin, transport adaptor or symportin                                            | <i>HEATR3</i>                 |
| YDL075W   | <i>RPL31A</i> | Ribosomal Protein of the Large subunit, ribosomal 60S subunit protein L31A                                  | <i>LOC641311</i>              |
| YDL080C   | <i>THI3</i>   | THIamine metabolism, regulatory protein that binds Pdc2p and Thi2p transcription factors                    | w/o orthologue                |
| YDL101C   | <i>DUN1</i>   | DNA-damage UNinducible, cell-cycle checkpoint serine-threonine kinase                                       | <i>CHEK2</i>                  |
| YDR123C   | <i>INO2</i>   | INOsitol requiring, transcription factor                                                                    | w/o orthologue                |
| YDR153C   | <i>ENT5</i>   | Epsin N-Terminal homology, protein containing an N-terminal epsin-like domain                               | <i>EPNI</i>                   |
| YDR159W   | <i>SAC3</i>   | Suppressor of ACtin, mRNA export factor                                                                     | <i>MCM3AP, SAC3D1</i>         |
| YDR171W   | <i>HSP42</i>  | Heat Shock Protein, small heat shock protein (sHSP) with chaperone activity                                 | w/o orthologue                |
| YDR174W   | <i>HMO1</i>   | High MObility group (HMG) family, chromatin associated high mobility group (HMG) family member              | <i>HMG20A</i>                 |
| YDR186C   | <i>SND1</i>   | Putative protein of unknown function                                                                        | w/o orthologue                |
| YDR195W   | <i>REF2</i>   | RNA End Formation, rNA-binding protein                                                                      | w/o orthologue                |
| YDR214W   | <i>AHA1</i>   | Activator of Heat shock protein 90 ATPase, co-chaperone that binds Hsp82p and activates its ATPase activity | <i>AHSA1</i>                  |
| YDR219C   | <i>MFB1</i>   | Mitochondria-associated F-Box protein, mitochondria-associated F-box protein                                | w/o orthologue                |
| YDR225W   | <i>HTA1</i>   | Histone h Two A, histone H2A                                                                                | <i>H2AFB2</i>                 |
| YDR378C   | <i>LSM6</i>   | Like SM, lsm (Like Sm) protein                                                                              | <i>LSM6, SNRPF</i>            |
| YDR537C   | unass.        | Dubious open reading frame                                                                                  | w/o orthologue                |
| YER016W   | <i>BIM1</i>   | BIning to Microtubules, microtubule plus end-tracking protein                                               | <i>MAPRE1, MAPRE2, MAPRE3</i> |
| YER066W   | <i>RRT13</i>  | Regulator of rDNA Transcription, putative protein of unknown function                                       | <i>FBXW7</i>                  |
| YER068W   | <i>MOT2</i>   | Modulator Of Transcription, ubiquitin-protein ligase subunit of the CCR4-NOT complex                        | <i>CNOT4</i>                  |
| YER092W   | <i>IES5</i>   | Ino Eighty Subunit, non-essential INO80 chromatin remodeling complex subunit                                | w/o orthologue                |
| YER119C-A | unass.        | Dubious open reading frame                                                                                  | w/o orthologue                |

|           |               |                                                                                                             |                                                                     |
|-----------|---------------|-------------------------------------------------------------------------------------------------------------|---------------------------------------------------------------------|
| YER151C   | <i>UBP3</i>   | UBiquitin-specific Protease, ubiquitin-specific protease involved in transport and osmotic response         | <i>USP10</i>                                                        |
| YFR034C   | <i>PHO4</i>   | PHOspate metabolism, basic helix-loop-helix (bHLH) transcription factor of the myc-family                   | <i>MLXIP</i>                                                        |
| YFR036W   | <i>CDC26</i>  | Cell Division Cycle, subunit of the Anaphase-Promoting Complex/Cyclosome (APC/C)                            | w/o orthologue                                                      |
| YGL007C-A | unass.        | Putative protein of unknown function                                                                        | w/o orthologue                                                      |
| YGL041C-B | unass.        | Putative protein of unknown function                                                                        | w/o orthologue                                                      |
| YGL168W   | <i>HUR1</i>   | HydroxyUrea Resistance, protein of unknown function                                                         | w/o orthologue                                                      |
| YGL222C   | <i>EDC1</i>   | Enhancer of mRNA DeCapping, rNA-binding protein that activates mRNA decapping directly                      | w/o orthologue                                                      |
| YGL241W   | <i>KAP114</i> | KAryoPherin, karyopherin                                                                                    | <i>IPO9</i>                                                         |
| YGL253W   | <i>HXK2</i>   | HeXoKinase, hexokinase isoenzyme 2                                                                          | <i>GCK, HKDC1, HK2</i>                                              |
| YGR006W   | <i>PRP18</i>  | Pre-mRNA Processing, splicing factor and component of snRNP U5                                              | <i>PRPF18</i>                                                       |
| YGR015C   | <i>EAT1</i>   | Putative protein of unknown function                                                                        | <i>ABHD11</i>                                                       |
| YGR081C   | <i>SLX9</i>   | Protein required for pre-rRNA processing                                                                    | w/o orthologue                                                      |
| YGR133W   | <i>PEX4</i>   | PEroXin, peroxisomal ubiquitin conjugating enzyme                                                           | <i>UBE2F</i>                                                        |
| YGR226C   | unass.        | Dubious open reading frame                                                                                  | w/o orthologue                                                      |
| YGR271C-A | <i>EFG1</i>   | Exit From G1, essential protein required for maturation of 18S rRNA                                         | w/o orthologue                                                      |
| YGR284C   | <i>ERV29</i>  | ER Vesicle, protein localized to COPII-coated vesicles                                                      | <i>SURF4</i>                                                        |
| YHR021C   | <i>RPS27B</i> | Ribosomal Protein of the Small subunit, protein component of the small (40S) ribosomal subunit              | <i>RPS27</i>                                                        |
| YHR025W   | <i>THR1</i>   | THReonine requiring, homoserine kinase                                                                      | w/o orthologue                                                      |
| YHR064C   | <i>SSZ1</i>   | Hsp70 protein that interacts with Zuo1p (a DnaJ homolog)                                                    | <i>HSPA2,HSPA8,HSPA14, HSPA6,</i>                                   |
| YIL154C   | <i>IMP2</i>   | Independent of Mitochondrial Particle, transcriptional activator involved in maintenance of ion homeostasis | w/o orthologue                                                      |
| YIL156W   | <i>UBP7</i>   | UBiquitin-specific Protease, ubiquitin-specific protease that cleaves ubiquitin-protein fusions             | <i>USP28,USP29,USP37,USP50, USP8,USP32,USP51,USP26, USP2,USP21,</i> |
| YIL157C   | <i>COA1</i>   | Cytochrome Oxidase Assembly, mitochondrial inner membrane protein                                           | w/o orthologue                                                      |
| YJL012C-A | unass.        | Merged open reading frame                                                                                   | w/o orthologue                                                      |
| YJL027C   | unass.        | Putative protein of unknown function                                                                        | w/o orthologue                                                      |



|           |               |                                                                                                                              |                                                            |
|-----------|---------------|------------------------------------------------------------------------------------------------------------------------------|------------------------------------------------------------|
| YJL080C   | <i>SCP160</i> | S. cerevisiae protein involved in the Control of Ploidy, essential RNA-binding G protein effector of mating response pathway | <i>HDLBP</i>                                               |
| YJL123C   | <i>MTC1</i>   | Maintenance of Telomere Capping, protein of unknown function that may interact with ribosomes                                | w/o orthologue                                             |
| YJL124C   | <i>LSM1</i>   | Like SM, lsm (Like Sm) protein                                                                                               | <i>LSM1</i>                                                |
| YJL141C   | <i>YAK1</i>   | Yet Another Kinase, serine-threonine protein kinase                                                                          | <i>DYRK1A/B,HIPK3,HIPK4,HIPK1,</i>                         |
| YJL176C   | <i>SWI3</i>   | SWItching deficient, subunit of the SWI/SNF chromatin remodeling complex                                                     | <i>SMARCC2, SMARCC1</i>                                    |
| YJL188C   | <i>BUD19</i>  | BUD site selection, dubious open reading frame                                                                               | w/o orthologue                                             |
| YKL009W   | <i>MRT4</i>   | mRNA Turnover 4, protein involved in mRNA turnover and ribosome assembly                                                     | <i>LOC124865</i>                                           |
| YKL096C-B | unass.        | Putative protein of unknown function                                                                                         | w/o orthologue                                             |
| YKL139W   | <i>CTK1</i>   | Carboxy-Terminal domain Kinase, catalytic (alpha) subunit of C-terminal domain kinase I (CTDK-I)                             | <i>CDC2L5, CDK9</i>                                        |
| YKL163W   | <i>PIR3</i>   | Protein containing Internal Repeats, o-glycosylated covalently-bound cell wall protein                                       | w/o orthologue                                             |
| YKR024C   | <i>DBP7</i>   | Dead Box Protein, putative ATP-dependent RNA helicase of the DEAD-box family                                                 | <i>DDX31</i>                                               |
| YKR095W   | <i>MLP1</i>   | Myosin-Like Protein, myosin-like protein associated with the nuclear envelope                                                | <i>TPR,LEKRI,GOLGA4,CENPE,CENPF,GOLGB1,</i>                |
| YLL002W   | <i>RTT109</i> | Regulator of Ty1 Transposition, histone acetyltransferase                                                                    | w/o orthologue                                             |
| YLL013C   | <i>PUF3</i>   | PUmilio-homology domain Family, protein of the mitochondrial outer surface                                                   | <i>PUM2, PUM1</i>                                          |
| YLL024C   | <i>SSA2</i>   | Stress-Seventy subfamily A, aTP-binding protein                                                                              | <i>HSPA8,HSPA1B,HSPA6,HSPA2,HSPA1A,HSPA1L,HSPA5,</i>       |
| YLL043W   | <i>FPS1</i>   | Fdp1 Suppressor, aquaglyceroporin                                                                                            | <i>AQP3 to 5, AQP7, AQP 7, AQP 9 &amp;10, LOC100509620</i> |
| YLL046C   | <i>RNP1</i>   | Ribonucleoprotein that contains two RNA recognition motifs (RRM)                                                             | w/o orthologue                                             |
| YLR015W   | <i>BRE2</i>   | BREfeldin A sensitivity, subunit of COMPASS (Set1C) complex                                                                  | <i>ASH2L</i>                                               |
| YLR046C   | unass.        | Putative membrane protein                                                                                                    | w/o orthologue                                             |
| YLR047C   | <i>FRE8</i>   | Protein with sequence similarity to iron/copper reductases                                                                   | w/o orthologue                                             |
| YLR048W   | <i>RPS0B</i>  | Ribosomal Protein of the Small subunit, protein component of the small (40S) ribosomal subunit                               | <i>RPSAP15</i>                                             |
| YLR057W   | <i>MNL2</i>   | MaNnosidase-Like protein, putative mannosidase involved in ER-associated protein degradation                                 | <i>MAN1B1,MAN1C1,MAN1A2,MAN1A1,</i>                        |

|           |               |                                                                                                                    |                                                           |
|-----------|---------------|--------------------------------------------------------------------------------------------------------------------|-----------------------------------------------------------|
| YLR061W   | <i>RPL22A</i> | Ribosomal Protein of the Large subunit, ribosomal 60S subunit protein L22A                                         | <i>RPL22, RPL22L1</i>                                     |
| YLR062C   | <i>BUD28</i>  | BUD site selection, dubious open reading frame                                                                     | w/o orthologue                                            |
| YLR063W   | <i>BMT6</i>   | Base Methyltransferase of Twenty five S rRNA 6, methyltransferase required for m3U2843 methylation of the 25S rRNA | w/o orthologue                                            |
| YLR072W   | <i>LAM6</i>   | Lipid transfer protein Anchored at Membrane contact site, protein of unknown function                              | <i>GRAMD1A, GRAMD1B, GRAMD1C, GRAMD2A</i>                 |
| YLR079W   | <i>SIC1</i>   | Substrate/Subunit Inhibitor of Cyclin-dependent protein kinase, cyclin-dependent kinase inhibitor (CKI)            | w/o orthologue                                            |
| YLR182W   | <i>SWI6</i>   | SWItching deficient, transcription cofactor                                                                        | w/o orthologue                                            |
| YLR322W   | <i>VPS65</i>  | Vacuolar Protein Sorting, dubious open reading frame                                                               | w/o orthologue                                            |
| YLR369W   | <i>SSQ1</i>   | Stress-Seventy subfamily Q, mitochondrial hsp70-type molecular chaperone                                           | <i>HSPA9</i>                                              |
| YLR418C   | <i>CDC73</i>  | Cell Division Cycle, component of the Paf1p complex                                                                | <i>CDC73</i>                                              |
| YLR433C   | <i>CNA1</i>   | CalciNeurin A, calcineurin A                                                                                       | <i>PPP3CA, B, C</i>                                       |
| YML009W-B | unass.        | Dubious open reading frame                                                                                         | w/o orthologue                                            |
| YML012C-A | unass.        | Dubious open reading frame                                                                                         | w/o orthologue                                            |
| YML014W   | <i>TRM9</i>   | TRna Methyltransferase, tRNA methyltransferase                                                                     | <i>ALKBH8, TRMT9B</i>                                     |
| YML024W   | <i>RPS17A</i> | Ribosomal Protein of the Small subunit, ribosomal protein 51 (rp51) of the small (40s) subunit                     | <i>RPS17</i>                                              |
| YML050W   | <i>AIM32</i>  | Altered Inheritance rate of Mitochondria, putative protein of unknown function                                     | w/o orthologue                                            |
| YML061C   | <i>PIF1</i>   | Petite Integration Frequency, dNA helicase                                                                         | <i>PIF1</i>                                               |
| YMR018W   | <i>PEX9</i>   | Putative protein of unknown function with similarity to human PEX5Rp                                               | <i>PEX5</i>                                               |
| YMR116C   | <i>ASC1</i>   | Absence of growth Suppressor of Cyp1, g-protein beta subunit and guanine dissociation inhibitor for Gpa2p          | <i>RACK1</i>                                              |
| YMR179W   | <i>SPT21</i>  | SuPpressor of Ty, protein with a role in transcriptional silencing                                                 | w/o orthologue                                            |
| YMR198W   | <i>CIK1</i>   | Chromosome Instability and Karyogamy, kinesin-associated protein                                                   | w/o orthologue                                            |
| YMR222C   | <i>FSH2</i>   | Family of Serine Hydrolases, putative serine hydrolase that localizes to the cytoplasm                             | <i>OVCA2, DHFRP1</i>                                      |
| YMR242W-A | unass.        | Putative protein of unknown function                                                                               | w/o orthologue                                            |
| YNL022C   | <i>RCM1</i>   | rRNA m5C methyltransferase                                                                                         | <i>NSUN7</i>                                              |
| YNL027W   | <i>CRZ1</i>   | Calcineurin-Responsive Zinc finger, transcription factor                                                           | <i>SP3, SP9, KLF10, SP5, SP1, OSR1, KLF17, KLF11, SP6</i> |

|         |               |                                                                                                                |                                                                                          |
|---------|---------------|----------------------------------------------------------------------------------------------------------------|------------------------------------------------------------------------------------------|
| YNL076W | <i>MKS1</i>   | Multicopy Kinase Suppressor, pleiotropic negative transcriptional regulator                                    | w/o orthologue                                                                           |
| YNL138W | <i>SRV2</i>   | Suppressor of RasVal19, cAP (cyclase-associated protein)                                                       | <i>CAP2, CAPI</i>                                                                        |
| YNL146W | unass.        | Putative protein of unknown function                                                                           | w/o orthologue                                                                           |
| YNL220W | <i>ADE12</i>  | adenylsuccinate synthesis; ADENine requiring, catalyzes the first step in synthesis of adenosine monophosphate | <i>ADSSI</i>                                                                             |
| YNR052C | <i>POP2</i>   | PGK promoter directed OverProduction, rNase of the DEDD superfamily                                            | <i>CNOT8, CNOT7,</i>                                                                     |
| YOL045W | <i>PSK2</i>   | Pas domain-containing Serine/threonine protein Kinase, pAS-domain containing                                   | <i>PIM2, PIM3,</i>                                                                       |
| YOL046C | unass.        | serine/threonine protein kinase Dubious open reading frame                                                     | w/o orthologue                                                                           |
| YOL054W | <i>PSH1</i>   | Pob3/Spt16 Histone associated, e3 ubiquitin ligase targeting centromere-binding protein Cse4p                  | <i>TRIM8, TRIM3, TRIM2, TRIM25, TRIM40,</i>                                              |
| YOL085C | unass.        | Dubious open reading frame                                                                                     | w/o orthologue                                                                           |
| YOR113W | <i>AZF1</i>   | Asparagine-rich Zinc-Finger, zinc-finger transcription factor                                                  | <i>SP1, FEZF2, FEZP1</i>                                                                 |
| YOR120W | <i>GCY1</i>   | Galactose-inducible Crystallin-like Yeast protein, glycerol dehydrogenase                                      | <i>AKR1B10, AKR1B1, AKR1A1, AKR1D1, AKR1C2, AKR1C1, AKR1E2, AKR1C3, AKR1C4, AKR1B15,</i> |
| YOR141C | <i>ARP8</i>   | Actin-Related Protein, nuclear actin-related protein involved in chromatin remodeling                          | <i>ACTR8</i>                                                                             |
| YOR196C | <i>LIP5</i>   | LIPoic acid, protein involved in biosynthesis of the coenzyme lipoic acid                                      | <i>LIAS</i>                                                                              |
| YOR301W | <i>RAX1</i>   | Protein involved in bud site selection during bipolar budding                                                  | <i>AKAP10</i>                                                                            |
| YOR309C | unass.        | Dubious open reading frame                                                                                     | w/o orthologue                                                                           |
| YOR312C | <i>RPL20B</i> | Ribosomal Protein of the Large subunit, ribosomal 60S subunit protein L20B                                     | <i>RPL18A</i>                                                                            |
| YPL008W | <i>CHL1</i>   | CHromosome Loss, probable DNA helicase                                                                         | <i>TNFRSF6B, BRIP1</i>                                                                   |
| YPL098C | <i>MGR2</i>   | Mitochondrial Genome Required, subunit of the TIM23 translocase complex                                        | <i>ROMO1</i>                                                                             |
| YPL106C | <i>SSE1</i>   | ATPase component of heat shock protein Hsp90 chaperone complex                                                 | <i>HYOU1, HSPA4L, HSPA4,</i>                                                             |
| YPL145C | <i>KES1</i>   | KrE11-1 Suppressor, one of seven members of the yeast oxysterol binding protein family                         | <i>OSBPL9, OSBPL11, OSBPL10, OSBPL8, OSBPL5</i>                                          |
| YPL174C | <i>NIP100</i> | Nuclear ImPort, large subunit of the dynactin complex                                                          | <i>CLIP3, CLIP2, CLIP4, CLIP1, CEP350,</i>                                               |
| YPL178W | <i>CBC2</i>   | Cap Binding Complex, small subunit of the heterodimeric cap binding complex with Sto1p                         | <i>NCBP2</i>                                                                             |

|           |               |                                                                               |                 |
|-----------|---------------|-------------------------------------------------------------------------------|-----------------|
| YPL240C   | <i>HSP82</i>  | Heat Shock Protein, hsp90 chaperone                                           | <i>HSP90AA1</i> |
| YPR043W   | <i>RPL43A</i> | Ribosomal Protein of the Large subunit, ribosomal 60S subunit protein L43A    | <i>RPL37A</i>   |
| YPR057W   | <i>BRR1</i>   | Bad Response to Refrigeration, snRNP protein component of spliceosomal snRNPs | w/o orthologue  |
| YPR096C   | unass.        | Protein of unknown function                                                   | w/o orthologue  |
| YPR159C-A | unass.        | Protein of unknown function                                                   | w/o orthologue  |
| YPR159W   | <i>KRE6</i>   | Killer toxin REsistant, type II integral membrane protein                     | w/o orthologue  |

---

*unass.* = *unassigned*

*w/o orthologue* = *without mammalian orthologue*

**Table S2.** Protective genes regarding amyloid toxicity in yeast and their mammalian orthologues

| Systematic Name | Yeast Gene | Function                                                                                               | Mammalian Gene Name |
|-----------------|------------|--------------------------------------------------------------------------------------------------------|---------------------|
| YAL039C         | CYC3       | CYtochrome C heme lyase (holocytochrome c synthase)                                                    | HCCS                |
| YBL007C         | SLA1       | Synthetic Lethal with ABP1, cytoskeletal protein binding protein                                       | w/o orthologue      |
| YBL022C         | PIM1       | Proteolysis In Mitochondria, ATP-dependent Lon protease                                                | LONP1               |
| YBL024W         | NCL1       | NuCLear protein, s-adenosyl-L-methionine-dependent tRNA: m5C-methyltransferase                         | NSUN2               |
| YBL038W         | MRPL16     | Mitochondrial Ribosomal Protein, Large subunit                                                         | MRPL16              |
| YBL045C         | COR1       | CORe protein of QH2 cytochrome c reductase                                                             | UQCRC1              |
| YBL051C         | PIN4       | Psi+ INducibility, involved in G2/M phase progression and response to DNA damage                       | w/o orthologue      |
| YBL052C         | SAS3       | Something About Silencing, histone acetyltransferase catalytic subunit of NuA3 complex                 | w/o orthologue      |
| YBL080C         | PET112     | PETite colonies, subunit of the trimeric GatFAB AmidoTransferase(AdT) complex                          | GATB                |
| YBL090W         | MRP21      | Mitochondrial Ribosomal Protein of the small subunit                                                   | w/o orthologue      |
| YBL098W         | BNA4       | Biosynthesis of Nicotinic Acid, kynurenine 3-monooxygenase                                             | KMO                 |
| YBL106C         | SRO77      | Suppressor of rho3, protein with roles in exocytosis and cation homeostasis                            | LLGL1               |
| YBR021W         | FUR4       | 5-FIUoRouridine sensitivity, plasma membrane localized uracil permease                                 | w/o orthologue      |
| YBR107C         | IML3       | Increased Minichromosome Loss, outer kinetochore protein and component of the Ctf19 complex            | w/o orthologue      |
| YBR113W         | unass.     | Dubious open reading frame                                                                             | w/o orthologue      |
| YBR114W         | RAD16      | RADiation sensitive, nucleotide excision repair (NER) protein                                          | ZRANB3              |
| YBR120C         | CBP6       | Cytochrome B Protein synthesis, mitochondrial protein required for translation of the COB mRNA         | w/o orthologue      |
| YBR131W         | CCZ1       | Calcium Caffeine Zinc sensitivity, subunit of a heterodimeric guanine nucleotide exchange factor (GEF) | w/o orthologue      |
| YBR163W         | EXO5       | EXOnuclease V, mitochondrial 5'-3' exonuclease and sliding exonuclease                                 | EXO5                |
| YBR241C         | VVS1       | Putative transporter                                                                                   | w/o orthologue      |

|           |        |                                                                                                                   |                  |
|-----------|--------|-------------------------------------------------------------------------------------------------------------------|------------------|
| YBR280C   | SAF1   | SCF Associated Factor, f-Box protein involved in proteasome-dependent degradation of Aah1p                        | w/o orthologue   |
| YBR282W   | MRPL27 | Mitochondrial Ribosomal Protein, large subunit                                                                    | MRPL41           |
| YBR283C   | SSH1   | Sec Sixty-one Homolog, subunit of the Ssh1 translocon complex                                                     | SEC61A1, SEC61A2 |
| YBR288C   | APM3   | Clathrin Adaptor Protein complex Medium chain, mu3-like subunit of the clathrin associated protein complex (AP-3) | AP3M1, AP3M2     |
| YBR296C   | PHO89  | PHOspate metabolism, plasma membrane Na <sup>+</sup> /Pi cotransporter                                            | w/o orthologue   |
| YCR003W   | MRPL32 | Mitochondrial Ribosomal Protein, large subunit                                                                    | MRPL32           |
| YCR028C-A | RIM1   | Replication In Mitochondria, ssDNA-binding protein essential for mitochondrial genome maintenance                 | SSBP1            |
| YCR046C   | IMG1   | Integrity of Mitochondrial Genome, mitochondrial ribosomal protein of the large subunit                           | MRPL19           |
| YCR053W   | THR4   | THReonine requiring, threonine synthase                                                                           | THNSL1           |
| YCR071C   | IMG2   | Integrity of Mitochondrial Genome, mitochondrial ribosomal protein of the large subunit                           | MRPL49           |
| YCR073W-A | SOL2   | Suppressor Of Los1-1, protein with a possible role in tRNA export                                                 | PGLS             |
| YDL044C   | MTF2   | Mitochondrial Transcription Factor, mitochondrial protein that interacts with mitochondrial RNA polymerase        | w/o orthologue   |
| YDL067C   | COX9   | Cytochrome c OXidase, subunit VIIa of cytochrome c oxidase (Complex IV)                                           | w/o orthologue   |
| YDL069C   | CBS1   | Cytochrome B Synthesis, mitochondrial translational activator of the COB mRNA                                     | w/o orthologue   |
| YDL104C   | QRI7   | Protein involved in threonylcarbamoyl adenosine biosynthesis                                                      | OSGEPL1          |
| YDL174C   | DLD1   | D-Lactate Dehydrogenase, d-lactate dehydrogenase                                                                  | LDHD             |
| YDL190C   | UFD2   | Ubiquitin Fusion Degradation, ubiquitin chain assembly factor (E4)                                                | UBE4A            |
| YDR028C   | REG1   | REsistance to Glucose repression, regulatory subunit of type 1 protein phosphatase Glc7p                          | w/o orthologue   |
| YDR029W   | unass. | Dubious open reading frame                                                                                        | w/o orthologue   |
| YDR035W   | ARO3   | AROmatic amino acid requiring, 3-deoxy-D-arabino-heptulosonate-7-phosphate (DAHP) synthase                        | w/o orthologue   |

|         |        |                                                                                                                       |                    |
|---------|--------|-----------------------------------------------------------------------------------------------------------------------|--------------------|
| YDR069C | DOA4   | Degradation Of Alpha, ubiquitin hydrolase                                                                             | USP21, USP50, USP8 |
| YDR077W | SED1   | Suppression of Exponential Defect, major stress-induced structural GPI-cell wall glycoprotein                         | w/o orthologue     |
| YDR079W | PET100 | PETite colonies, chaperone that facilitates the assembly of cytochrome c oxidase                                      | w/o orthologue     |
| YDR114C | unass. | Putative protein of unknown function                                                                                  | w/o orthologue     |
| YDR115W | MRX14  | Mitochondrial organization of gene expression, putative mitochondrial ribosomal protein of the large subunit          | MRPL34             |
| YDR128W | MTC5   | Maintenance of Telomere Capping, subunit of the SEA (Seh1-associated) complex                                         | WDR59              |
| YDR194C | MSS116 | Mitochondrial Splicing System, mitochondrial transcription elongation factor                                          | w/o orthologue     |
| YDR197W | CBS2   | Cytochrome B Synthesis, mitochondrial translational activator of the COB mRNA                                         | w/o orthologue     |
| YDR230W | unass. | Dubious open reading frame                                                                                            | w/o orthologue     |
| YDR256C | CTA1   | CaTalase A, catalase A                                                                                                | CAT                |
| YDR268W | MSW1   | Mitochondrial aminoacyl-tRNA Synthetase, tryptophan (W)                                                               | WARS2              |
| YDR296W | MHR1   | Mitochondrial Homologous Recombination, protein involved in homologous recombination in mitochondria                  | w/o orthologue     |
| YDR298C | ATP5   | ATP synthase, subunit 5 of the stator stalk of mitochondrial F1F0 ATP synthase                                        | ATP5PO             |
| YDR347W | MRP1   | Mitochondrial Ribosomal Protein, mitochondrial ribosomal protein of the small subunit                                 | w/o orthologue     |
| YDR375C | BCS1   | Ubiquinol-cytochrome c reductase (bc1) Synthesis, protein translocase and chaperone required for Complex III assembly | BCS1L              |
| YDR377W | ATP17  | ATP synthase, subunit f of the F0 sector of mitochondrial F1F0 ATP synthase                                           | w/o orthologue     |
| YDR405W | MRP20  | Mitochondrial Ribosomal Protein, mitochondrial ribosomal protein of the large subunit                                 | MRPL23             |
| YDR421W | ARO80  | AROMATIC amino acid requiring, zinc finger transcriptional activator of the Zn2Cys6 family                            | w/o orthologue     |
| YDR442W | unass. | Dubious open reading frame                                                                                            | w/o orthologue     |
| YDR443C | SSN2   | Suppressor of SNf1, subunit of the RNA polymerase II mediator complex                                                 | SLC50A1            |

|           |        |                                                                                                             |                |
|-----------|--------|-------------------------------------------------------------------------------------------------------------|----------------|
| YDR529C   | QCR7   | UbiQuinol-cytochrome C<br>oxidoReductase, subunit 7 of<br>ubiquinol cytochrome-c reductase<br>(Complex III) | UQCRB          |
| YEL071W   | DLD3   | D-Lactate Dehydrogenase, d-<br>lactate dehydrogenase                                                        | D2HGDH         |
| YER005W   | YND1   | Yeast Nucleoside Diphosphatase,<br>apyrase with wide substrate<br>specificity                               | ENTPD4, ENTPD7 |
| YER017C   | AFG3   | ATPase Family Gene,<br>mitochondrial inner membrane m-<br>AAA protease component                            | AFG3L2         |
| YER035W   | EDC2   | Enhancer of mRNA DeCapping,<br>rNA-binding protein that directly<br>activates mRNA decapping                | w/o orthologue |
| YER042W   | MXR1   | Peptide Methionine sulfoXide<br>Reductase, methionine-S-<br>sulfoxide reductase                             | MSRA           |
| YER050C   | RSM18  | Ribosomal Small subunit of<br>Mitochondria, mitochondrial<br>ribosomal protein of the small<br>subunit      | MRPS18C        |
| YER055C   | HIS1   | HISidine, aTP<br>phosphoribosyltransferase                                                                  | w/o orthologue |
| YER058W   | PET117 | PETite colonies, protein required<br>for assembly of cytochrome c<br>oxidase                                | PET117         |
| YER060W-A | FCY22  | FluoroCYtosine resistance,<br>putative purine-cytosine permease                                             | w/o orthologue |
| YER084W   | unass. | Protein of unknown function                                                                                 | w/o orthologue |
| YER087W   | AIM10  | Altered Inheritance rate of<br>Mitochondria, protein with<br>similarity to tRNA synthetases                 | PARS2          |
| YER108C   | unass. | Merged ORF                                                                                                  | w/o orthologue |
| YER134C   | unass. | Magnesium-dependent acid<br>phosphatase                                                                     | w/o orthologue |
| YER153C   | PET122 | PETite colonies, mitochondrial<br>translational activator specific for<br>the COX3 mRNA                     | w/o orthologue |
| YER154W   | OXA1   | Cytochrome OXidase Activity,<br>mitochondrial inner membrane<br>insertase                                   | OXA2           |
| YFL030W   | AGX1   | Alanine:Glyoxylate<br>aminotrans(X)ferase,<br>alanine:glyoxylate<br>aminotransferase (AGT)                  | AGXT           |
| YFL036W   | RPO41  | RNA POLymerase, mitochondrial<br>RNA polymerase                                                             | POLRMT         |
| YFR024C   | LSB3   | Deleted ORF                                                                                                 | w/o orthologue |
| YGL003C   | CDH1   | CDC20 Homolog, activator of<br>anaphase-promoting<br>complex/cyclosome (APC/C)                              | FZR1           |
| YGL034C   | unass. | Dubious open reading frame                                                                                  | w/o orthologue |
| YGL042C   | unass. | Dubious open reading frame                                                                                  | w/o orthologue |



|         |        |                                                                                               |                |
|---------|--------|-----------------------------------------------------------------------------------------------|----------------|
| YGL064C | MRH4   | Mitochondrial RNA Helicase, mitochondrial ATP-dependent RNA helicase of the DEAD-box family   | DDX28          |
| YGL107C | RMD9   | Required for Meiotic nuclear Division, mitochondrial protein required for respiratory growth  | w/o orthologue |
| YGL119W | COQ8   | COenzyme Q, protein required for ubiquinone biosynthesis and respiratory growth               | COQ8A, COQ8B   |
| YGL124C | MON1   | MONensin sensitivity, subunit of a heterodimeric guanine nucleotide exchange factor (GEF)     | MON1A, MON1B   |
| YGL125W | MET13  | METHionine requiring, major isozyme of methylenetetrahydrofolate reductase                    | MTHFR          |
| YGL126W | SCS3   | Suppressor of Choline Sensitivity, protein required for inositol prototrophy                  | FITM2          |
| YGL129C | RSM23  | Ribosomal Small subunit of Mitochondria, mitochondrial ribosomal protein of the small subunit | DAP3           |
| YGL143C | MRF1   | Mitochondrial peptide chain Release Factor, mitochondrial translation release factor          | MTRF1, MTRF1L  |
| YGL148W | ARO2   | AROMATIC amino acid requiring, bifunctional chorismate synthase and flavin reductase          | w/o orthologue |
| YGL186C | TPN1   | Transport of PyridoxiNe, plasma membrane pyridoxine (vitamin B6) transporter                  | w/o orthologue |
| YGL205W | POX1   | Fatty-acyl coenzyme A oxidase                                                                 | ACOXL          |
| YGL208W | SIP2   | SNF1-Interacting Protein, one of three beta subunits of the Snf1 kinase complex               | PRKAB1, PRKAB2 |
| YGL215W | CLG1   | Cyclin-Like Gene, cyclin-like protein that interacts with Pho85p                              | CNPPD1         |
| YGL255W | ZRT1   | Zinc-Regulated Transporter, high-affinity zinc transporter of the plasma membrane             | SLC39A1        |
| YGR034W | RPL26B | Ribosomal Protein of the Large subunit, ribosomal 60S subunit protein L26B                    | RPL26          |
| YGR035C | unass. | Putative protein of unknown function                                                          | w/o orthologue |
| YGR043C | NQM1   | Non-Quiescent Mutant, transaldolase of unknown function                                       | TALDO1         |
| YGR062C | COX18  | Cytochrome c OXidase, protein required for membrane insertion of C-terminus of Cox2p          | COX18          |
| YGR070W | ROM1   | RhO1 Multicopy suppressor, gDP/GTP exchange protein (GEP) for Rho1p                           | ARHGEF3, NET1  |

|         |        |                                                                                                                |                |
|---------|--------|----------------------------------------------------------------------------------------------------------------|----------------|
| YGR093W | DRN1   | Debranching enzyme-associated RiboNuclease, splicing factor that modulates turnover of branched RNAs by Dbr1p  | CWF19L1        |
| YGR102C | GTF1   | GlutaminyI Transamidase subunit F, subunit of the trimeric GatFAB AmidoTransferase(AdT) complex                | w/o orthologue |
| YGR112W | SHY1   | SURF Homolog of Yeast, mitochondrial inner membrane protein required for complex IV assembly                   | SURF1          |
| YGR129W | SYF2   | SYnthetic lethal with cdc40 (Forty), member of the NineTeen Complex (NTC)                                      | w/o orthologue |
| YGR138C | TPO2   | Transporter of POLyamines, polyamine transporter of the major facilitator superfamily                          | w/o orthologue |
| YGR150C | CCM1   | COB and COX1 mRNA maturation, mitochondrial 15S rRNA-binding protein                                           | w/o orthologue |
| YGR165W | MRPS35 | Mitochondrial Ribosomal Protein, Small subunit                                                                 | w/o orthologue |
| YGR171C | MSM1   | Mitochondrial aminoacyl-tRNA Synthetase, Methionine                                                            | MARS2          |
| YGR204W | ADE3   | ADEnine requiring, cytoplasmic trifunctional enzyme C1-tetrahydrofolate synthase                               | MTHFD1         |
| YGR215W | RSM27  | Ribosomal Small subunit of Mitochondria, mitochondrial ribosomal protein of the small subunit                  | w/o orthologue |
| YGR220C | MRPL9  | Mitochondrial Ribosomal Protein, Large subunit                                                                 | MRPL3          |
| YGR222W | PET54  | PETite colonies, mitochondrial inner membrane protein                                                          | w/o orthologue |
| YGR255C | COQ6   | COenzyme Q, putative flavin-dependent monooxygenase                                                            | COQ6           |
| YGR257C | MTM1   | Manganese Trafficking factor for Mitochondrial SOD2, mitochondrial protein of the mitochondrial carrier family | w/o orthologue |
| YHL006C | SHU1   | Suppressor of HU sensitivity, component of Shu complex (aka PCSS complex)                                      | w/o orthologue |
| YHL008C | unass. | Putative protein of unknown function                                                                           | w/o orthologue |
| YHL010C | ETP1   | Ethanol Tolerance Protein, putative protein of unknown function required for growth on ethanol                 | BRAP           |
| YHL019C | APM2   | Clathrin Adaptor Protein complex Medium chain, protein of unknown function                                     | w/o orthologue |
| YHL034C | SBP1   | Protein that binds eIF4G and has a role in repression of translation                                           | w/o orthologue |

|           |       |                                                                                                   |                |
|-----------|-------|---------------------------------------------------------------------------------------------------|----------------|
| YHL035C   | VMR1  | Vacuolar Multidrug Resistance, vacuolar membrane protein                                          | CFTR           |
| YHL038C   | CBP2  | Cytochrome B mRNA Processing, required for splicing of the group I intron b15 of the COB pre-mRNA | w/o orthologue |
| YHL045W   | PXP3  | Putative protein of unknown function                                                              | w/o orthologue |
| YHL046C   | PAU13 | SeriPAUperin, protein of unknown function                                                         | w/o orthologue |
| YHL047C   | ARN2  | AFT1 ReguloN, transporter                                                                         | w/o orthologue |
| YHR011W   | DIA4  | Digs Into Agar, probable mitochondrial seryl-tRNA synthetase                                      | SARS2          |
| YHR012W   | VPS29 | Vacuolar Protein Sorting, subunit of the membrane-associated retromer complex                     | VPS29          |
| YHR015W   | MIP6  | Mex67-Interacting Protein, putative RNA-binding protein                                           | w/o orthologue |
| YHR037W   | PUT2  | Proline Utilization, delta-1-pyrroline-5-carboxylate dehydrogenase                                | ALDH4A1        |
| YHR050W-A |       | Protein of unknown function                                                                       | w/o orthologue |
| YHR051W   | COX6  | Cytochrome c OXidase, subunit VI of cytochrome c oxidase (Complex IV)                             | COX5A          |
| YHR116W   | COX23 | Cytochrome OXidase, protein that functions in mitochondrial copper homeostasis                    | CHCHD7         |
| YHR147C   | MRPL6 | Mitochondrial Ribosomal Protein, Large subunit                                                    | RPL9           |
| YHR151C   | MTC6  | Maintenance of Telomere Capping, protein of unknown function                                      | w/o orthologue |
| YHR155W   | YSP1  | Yeast Suicide Protein, mitochondrial protein                                                      | CCNY           |
| YHR168W   | MTG2  | MiTochondrial Gtpase 2, putative GTPase                                                           | GTPBP10, MTG2  |
| YHR198C   | AIM18 | Altered Inheritance rate of Mitochondria, putative protein of unknown function                    | w/o orthologue |
| YIL002C   | INP51 | INositol polyphosphate 5-Phosphatase, phosphatidylinositol 4                                      | SYNJ1, SYNJ2   |
| YIL006W   | YIA6  | Mitochondrial NAD <sup>+</sup> transporter                                                        | SLC25A32       |
| YIL036W   | CST6  | Chromosome STability, basic leucine zipper (bZIP) transcription factor                            | ATF2, CREB5    |
| YIL039W   | TED1  | Trafficking of Emp24p/Erv25p-dependent cargo Disrupted, gPI-glycan remodelase                     | MPPE1          |
| YIL041W   | GVP36 | Golgi Vesicle Protein, bAR domain protein that localizes to early and late Golgi vesicles         | w/o orthologue |
| YIL049W   | DFG10 | Defective for Filamentous Growth, probable polyprenol reductase                                   | SRD5A3         |

|           |        |                                                                                                       |                |
|-----------|--------|-------------------------------------------------------------------------------------------------------|----------------|
| YIL050W   | PCL7   | Pho85 CycLin, pho85p cyclin of the Pho80p subfamily                                                   | w/o orthologue |
| YIL053W   | GPP1   | Glycerol-3-Phosphate Phosphatase, constitutively expressed DL-glycerol-3-phosphate phosphatase        | w/o orthologue |
| YIL064W   | EFM4   | Elongation Factor Methyltransferase, lysine methyltransferase                                         | EEF1AKMT2      |
| YIL071C   | PCI8   | Proteasome-COP9 signalosome (CSN)-eIF3, possible shared subunit of Cop9 signalosome (CSN) and eIF3    | GPS1           |
| YIL073C   | SPO22  | SPOrulation, meiosis-specific protein essential for chromosome synapsis                               | TEX11          |
| YIL077C   |        | Putative protein of unknown function                                                                  | w/o orthologue |
| YIL092W   |        | Putative protein of unknown function                                                                  | w/o orthologue |
| YIL114C   | POR2   | PORin, putative mitochondrial porin (voltage-dependent anion channel)                                 | VDAC1          |
| YIL135C   | VHS2   | Viable in a Hal3 Sit4 background, regulator of septin dynamics                                        | w/o orthologue |
| YIL152W   | VPR1   | Putative protein of unknown function                                                                  | w/o orthologue |
| YIR016W   | unass. | Putative protein of unknown function                                                                  | w/o orthologue |
| YIR029W   | DAL2   | Degradation of Allantoin, allantoinase                                                                | ALLC           |
| YJL007C   |        | Dubious open reading frame                                                                            | w/o orthologue |
| YJL023C   | PET130 | PETite colonies, protein required for respiratory growth                                              | w/o orthologue |
| YJL055W   | LOG1   | Putative protein of unknown function                                                                  | w/o orthologue |
| YJL062W-A | COA3   | Cytochrome Oxidase Assembly, mitochondrial protein required for cytochrome c oxidase assembly         | COA3           |
| YJL095W   | BCK1   | Bypass of C Kinase, mAPKKK acting in the protein kinase C signaling pathway                           | MAP3K19        |
| YJL096W   | MRPL49 | Mitochondrial Ribosomal Protein, Large subunit                                                        | MRPL21         |
| YJL102W   | MEF2   | Mitochondrial Elongation Factor, mitochondrial elongation factor involved in translational elongation | GFM2           |
| YJL116C   | NCA3   | Nuclear Control of ATPase, protein involved in mitochondrion organization                             | w/o orthologue |
| YJL120W   | unass. | Dubious open reading frame                                                                            | w/o orthologue |
| YJL147C   | SMT1   | Mitochondrial organization of gene expression, mitochondrial protein of unknown function              | w/o orthologue |
| YJL149W   | DAS1   | Dst1-delta 6-Azuracil Sensitivity, putative SCF ubiquitin ligase F-box protein                        | w/o orthologue |

|           |        |                                                                                                                                                 |                |
|-----------|--------|-------------------------------------------------------------------------------------------------------------------------------------------------|----------------|
| YJL163C   | unass. | Putative protein of unknown function                                                                                                            | w/o orthologue |
| YJL192C   | SOP4   | Suppressor Of Pma1-7, eR-membrane protein                                                                                                       | w/o orthologue |
| YJL193W   | unass. | Putative protein of unknown function                                                                                                            | w/o orthologue |
| YJL209W   | CBP1   | Cytochrome B mRNA Processing, mitochondrial protein                                                                                             | w/o orthologue |
| YJR030C   | RBH2   | Putative protein of unknown function                                                                                                            | w/o orthologue |
| YJR031C   | GEA1   | Guanine nucleotide Exchange on ARF, guanine nucleotide exchange factor for ADP ribosylation factors (ARFs)                                      | GBF1           |
| YJR101W   | RSM26  | Ribosomal Small subunit of Mitochondria, mitochondrial ribosomal protein of the small subunit                                                   | w/o orthologue |
| YJR113C   | RSM7   | Ribosomal Small subunit of Mitochondria, mitochondrial ribosomal protein of the small subunit                                                   | MRPS7          |
| YJR137C   | MET5   | METHionine requiring, sulfite reductase beta subunit                                                                                            | w/o orthologue |
| YJR144W   | MGM101 | Mitochondrial Genome Maintenance, protein with a role in mitochondrial DNA recombination repair                                                 | w/o orthologue |
| YJR146W   | unass. | Protein of unknown function                                                                                                                     | w/o orthologue |
| YKL002W   | DID4   | Doa4-Independent Degradation, class E Vps protein of the ESCRT-III complex                                                                      | CHMP2A         |
| YKL003C   | MRP17  | Mitochondrial Ribosomal Protein, mitochondrial ribosomal protein of the small subunit                                                           | MRPS6          |
| YKL073W   | LHS1   | Lumenal Hsp Seventy, molecular chaperone of the endoplasmic reticulum lumen                                                                     | HYOU1          |
| YKL097C   | unass. | Dubious open reading frame                                                                                                                      | w/o orthologue |
| YKL137W   | CMC1   | Cx9C Mitochondrial protein necessary for full assembly of Cytochrome c oxidase, copper-binding protein of the mitochondrial intermembrane space | CMC1           |
| YKL169C   | unass. | Dubious open reading frame                                                                                                                      | w/o orthologue |
| YKL170W   | MRPL38 | Mitochondrial Ribosomal Protein, Large subunit                                                                                                  | w/o orthologue |
| YKL174C   | TPO5   | Transporter of POLyamines, protein involved in excretion of putrescine and spermidine                                                           | w/o orthologue |
| YKL187C   | FAT3   | FATty acid transporter 3, protein required for fatty acid uptake                                                                                | w/o orthologue |
| YKL202W   | unass. | Dubious open reading frame                                                                                                                      | w/o orthologue |
| YKR035W-A | DID2   | Doa4-Independent Degradation, class E protein of the vacuolar protein-sorting (Vps) pathway                                                     | CHMP1A, CHMP1B |

|           |        |                                                                                                       |                |
|-----------|--------|-------------------------------------------------------------------------------------------------------|----------------|
| YKR046C   | PET10  | PETite colonies, protein of unknown function that localizes to lipid particles                        | w/o orthologue |
| YKR085C   | MRPL20 | Mitochondrial Ribosomal Protein, Large subunit                                                        | w/o orthologue |
| YKR088C   | TVP38  | Tlg2-Vesicle Protein, integral membrane protein                                                       | TMEM64         |
| YKR093W   | PTR2   | Peptide TRansport, integral membrane peptide transporter                                              | SLC15A1        |
| YKR097W   | PCK1   | Phosphoenolpyruvate CarboxyKinase, phosphoenolpyruvate carboxykinase                                  | w/o orthologue |
| YLL018C-A | COX19  | Cytochrome c OXidase, protein required for cytochrome c oxidase assembly                              | COX19          |
| YLL033W   | IRC19  | Increased Recombination Centers, putative protein of unknown function                                 | w/o orthologue |
| YLL039C   | UBI4   | Ubiquitin, ubiquitin                                                                                  | UBB, UBC       |
| YLL047W   | unass. | Dubious open reading frame                                                                            | w/o orthologue |
| YLL054C   | unass. | Putative protein of unknown function with similarity to Pip2p                                         | w/o orthologue |
| YLR025W   | SNF7   | Sucrose NonFermenting, one of four subunits of the ESCRT-III complex                                  | CHMP4A, CHMP4B |
| YLR038C   | COX12  | Cytochrome c OXidase, subunit VIb of cytochrome c oxidase                                             | COX6B1,3       |
| YLR055C   | SPT8   | SuPpressor of Ty, subunit of the SAGA transcriptional regulatory complex                              | w/o orthologue |
| YLR056W   | ERG3   | ERGosterol biosynthesis, c-5 sterol desaturase                                                        | SC5D           |
| YLR067C   | PET309 | PETite colonies, specific translational activator for the COX1 mRNA                                   | w/o orthologue |
| YLR069C   | MEF1   | Mitochondrial Elongation Factor, mitochondrial elongation factor involved in translational elongation | GFM1           |
| YLR091W   | GEP5   | GENetic interactors of Prohibitins, protein of unknown function                                       | w/o orthologue |
| YLR096W   | KIN2   | KINase, serine/threonine protein kinase involved in regulation of exocytosis                          | SIK3           |
| YLR098C   | CHA4   | Catabolism of Hydroxy Amino acids, dNA binding transcriptional activator                              | w/o orthologue |
| YLR137W   | RKM5   | Ribosomal lysine (K) Methyltransferase 5, protein lysine methyltransferase                            | w/o orthologue |
| YLR139C   | SLS1   | Synthetic Lethal with SSM4, mitochondrial membrane protein                                            | w/o orthologue |
| YLR148W   | PEP3   | carboxyPEPtidase Y-deficient, component of CORVET membrane tethering complex                          | VPS18          |

|         |        |                                                                                                                 |                |
|---------|--------|-----------------------------------------------------------------------------------------------------------------|----------------|
| YLR150W | STM1   | Suppressor of ToM1, protein required for optimal translation under nutrient stress                              | w/o orthologue |
| YLR151C | PCD1   | Peroxisomal Coenzyme A Diphosphatase, 8-oxo-dGTP diphosphatase                                                  | NUDT7, NUDT8   |
| YLR183C | TOS4   | Target Of Sbf, putative transcription factor                                                                    | w/o orthologue |
| YLR201C | COQ9   | COenzyme Q, protein required for ubiquinone biosynthesis and respiratory growth                                 | COQ9           |
| YLR202C | unass. | Dubious open reading frame                                                                                      | w/o orthologue |
| YLR203C | MSS51  | Mitochondrial Splicing Suppressor, specific translational activator for the mitochondrial COX1 mRNA             | w/o orthologue |
| YLR209C | PNP1   | purine nucleoside phosphorylase, purine nucleoside phosphorylase                                                | PNP            |
| YLR282C | unass. | Dubious open reading frame                                                                                      | w/o orthologue |
| YLR285W | NNT1   | Nicotinamide N-methyltransferase, s-adenosylmethionine-dependent methyltransferase                              | METTL21C       |
| YLR337C | VRP1   | VeRProlin, verprolin Nonsense-Mediated mRNA Decay, protein that may be involved in nonsense-mediated mRNA decay | WIPF1, WIPF2   |
| YLR363C | NMD4   |                                                                                                                 | w/o orthologue |
| YLR382C | NAM2   | Nuclear Accommodation of Mitochondria, mitochondrial leucyl-tRNA synthetase                                     | LARS2          |
| YLR396C | VPS33  | Vacuolar Protein Sorting, aTP-binding protein that is a subunit of the HOPS and CORVET complexes                | VPS33A         |
| YLR429W | CRN1   | CoRoNin, coronin                                                                                                | CORO1A         |
| YLR431C | ATG23  | AuTophagy related, peripheral membrane protein required for autophagy and CVT                                   | w/o orthologue |
| YLR439W | MRPL4  | Mitochondrial Ribosomal Protein, Large subunit                                                                  | MRPL47         |
| YLR446W | unass. | Putative hexokinase                                                                                             | w/o orthologue |
| YML008C | ERG6   | ERGosterol biosynthesis, delta(24)-sterol C-methyltransferase                                                   | METTL27        |
| YML108W | unass. | Protein of unknown function                                                                                     | w/o orthologue |
| YML121W | GTR1   | GTP binding protein Resemblance, cytoplasmic GTPase                                                             | RRAGA          |
| YMR024W | MRPL3  | Mitochondrial Ribosomal Protein, Large subunit                                                                  | MRPL44         |
| YMR025W | CSII   | Cop9 Signalosome Interactor, subunit of the Cop9 signalosome                                                    | w/o orthologue |
| YMR030W | RSF1   | ReSpiration Factor, protein required for respiratory growth                                                     | w/o orthologue |

|         |        |                                                                                                                 |                |
|---------|--------|-----------------------------------------------------------------------------------------------------------------|----------------|
| YMR032W | HOF1   | Homolog Of cdc Fifteen, protein that regulates actin cytoskeleton organisation                                  | GAS7, PSTPIP1  |
| YMR035W | IMP2   | Inner Membrane Protease, catalytic subunit of mitochondrial inner membrane peptidase complex                    | IMMP2L         |
| YMR040W | YET2   | Yeast Endoplasmic reticulum Transmembrane protein, protein of unknown function that may interact with ribosomes | BCAP31         |
| YMR044W | IOC4   | Iswi One Complex, member of a complex (Isw1b) with Isw1p and Ioc2p                                              | HDGF, HDGFL1   |
| YMR064W | AEP1   | ATPase Expression, protein required for expression of the mitochondrial OLI1 gene                               | w/o orthologue |
| YMR072W | ABF2   | ARS-Binding Factor, mitochondrial DNA-binding protein                                                           | HMGB1, HMGB2   |
| YMR086W | SEG1   | Stability of Eisosomes Guaranteed, component of eisosome required for proper eisosome assembly                  | w/o orthologue |
| YMR089C | YTA12  | Yeast Tat-binding Analog, mitochondrial inner membrane m-AAA protease component                                 | AFG3L2         |
| YMR111C | EUC1   | Protein of unknown function                                                                                     | w/o orthologue |
| YMR119W | ASI1   | Amino acid Sensor-Independent, subunit of the nuclear inner membrane Asi ubiquitin ligase complex               | w/o orthologue |
| YMR122C | unass. | Dubious open reading frame                                                                                      | w/o orthologue |
| YMR150C | IMP1   | Inner Membrane Protease, catalytic subunit of mitochondrial inner membrane peptidase complex                    | IMMP1L         |
| YMR158W | MRPS8  | Mitochondrial Ribosomal Protein, Small subunit                                                                  | w/o orthologue |
| YMR159C | ATG16  | AuTophagy related, conserved protein involved in autophagy                                                      | w/o orthologue |
| YMR174C | PAI3   | Proteinase A Inhibitor, cytoplasmic proteinase A (Pep4p) inhibitor                                              | w/o orthologue |
| YMR228W | MTF1   | Mitochondrial Transcription Factor, mitochondrial RNA polymerase specificity factor                             | w/o orthologue |
| YNL068C | FKH2   | ForK head Homolog, forkhead family transcription factor                                                         | FOXK1, FOXK2   |
| YNL074C | MLF3   | Multicopy suppressor of LeFlunomide sensitivity, serine-rich protein of unknown function                        | w/o orthologue |
| YNL081C | SWS2   | Sick Without Securin, putative mitochondrial ribosomal protein of the small subunit                             | w/o orthologue |
| YNL093W | YPT53  | Yeast Protein Two, stress-induced Rab family GTPase                                                             | RAB5A          |



|           |        |                                                                                         |                  |
|-----------|--------|-----------------------------------------------------------------------------------------|------------------|
| YNL095C   | unass. | Putative protein of unknown function                                                    | w/o orthologue   |
| YNL097C   | PHO23  | PHOspate metabolism, component of the Rpd3L histone deacetylase complex                 | ING1, ING2, ING4 |
| YNL122C   | MRP35  | Putative protein of unknown function                                                    | w/o orthologue   |
| YNL143C   | unass. | Protein of unknown function                                                             | w/o orthologue   |
| YNL177C   | MRPL22 | Mitochondrial Ribosomal Protein, Large subunit                                          | MRPL22           |
| YNL183C   | NPR1   | Nitrogen Permease Reactivator, protein kinase                                           | w/o orthologue   |
| YNL184C   | unass. | Protein of unknown function                                                             | w/o orthologue   |
| YNL190W   | unass. | Hydrophilin essential in desiccation-rehydration process                                | w/o orthologue   |
| YNL194C   | unass. | Integral membrane protein                                                               | w/o orthologue   |
| YNL196C   | SLZ1   | Sporulation-specific protein with a leucine zipper motif                                | w/o orthologue   |
| YNL201C   | PSY2   | Platinum Sensitivity, subunit of protein phosphatase PP4 complex                        | PPP4R3A, PPP4R3B |
| YNL208W   | unass. | Protein of unknown function                                                             | w/o orthologue   |
| YNL213C   | RRG9   | Required for Respiratory Growth, protein of unknown function                            | NGRN             |
| YNL219C   | ALG9   | Asparagine-Linked Glycosylation, mannosyltransferase                                    | ALG9             |
| YNL225C   | CNM67  | Chaotic Nuclear Migration, component of the spindle pole body outer plaque              | w/o orthologue   |
| YNL252C   | MRPL17 | Mitochondrial Ribosomal Protein, Large subunit                                          | MRPL46           |
| YNR036C   | MRPS12 | Mitochondrial Ribosomal Protein, Small subunit                                          | MRPS12           |
| YNR041C   | COQ2   | COenzyme Q, para hydroxybenzoate polyprenyl transferase                                 | COQ2             |
| YNR074C   | AIF1   | Apoptosis-Inducing Factor, mitochondrial cell death effector                            | AIFM2            |
| YNR075W   | COS10  | Endosomal protein involved in turnover of plasma membrane protein                       | w/o orthologue   |
| YOL004W   | SIN3   | Switch INdependent, component of both the Rpd3S and Rpd3L histone deacetylase complexes | SIN3A, SIN34     |
| YOL007C   | CSI2   | Chitin Synthesis Involved, protein of unknown function                                  | w/o orthologue   |
| YOL009C   | MDM12  | Mitochondrial Distribution and Morphology, mitochondrial outer membrane protein         | w/o orthologue   |
| YOL013W-A | unass. | Putative protein of unknown function                                                    | w/o orthologue   |
| YOL033W   | MSE1   | Mitochondrial aminoacyl-tRNA Synthetase, Glutamate (E)                                  | EARS2            |
| YOL104C   | NDJ1   | NonDisJunction, meiosis-specific telomere protein                                       | w/o orthologue   |

|           |        |                                                                                                                          |                  |
|-----------|--------|--------------------------------------------------------------------------------------------------------------------------|------------------|
| YOL105C   | WSC3   | Cell Wall integrity and Stress response Component, sensor-transducer of the stress-activated PKC1-MPK1 signaling pathway | w/o orthologue   |
| YOL129W   | VPS68  | Vacuolar Protein Sorting, vacuolar membrane protein of unknown function                                                  | TMEM50A, TMEM50B |
| YOR125C   | CAT5   | CATabolite repression, protein required for ubiquinone (Coenzyme Q) biosynthesis                                         | COQ7             |
| YOR175C   | ALE1   | Acyltransferase for Lyso-phosphatidylEthanolamine, broad-specificity lysophospholipid acyltransferase                    | w/o orthologue   |
| YOR187W   | TUF1   | Mitochondrial translation elongation factor Tu                                                                           | TUFM             |
| YOR253W   | NAT5   | N-terminal AcetylTransferase, subunit of protein N-terminal acetyltransferase NatA                                       | NAA50            |
| YOR269W   | PAC1   | Perish in the Absence of Cin8p, involved in nuclear migration                                                            | PAFAH1B1         |
| YOR277C   | unass. | Dubious open reading frame                                                                                               | w/o orthologue   |
| YOR285W   | RDL1   | RhoDanese-Like protein, thiosulfate sulfurtransferase                                                                    | TSTD1            |
| YOR298C-A | MBF1   | Multiprotein Bridging Factor, transcriptional coactivator                                                                | EDF1             |
| YOR300W   | unass. | Dubious open reading frame                                                                                               | w/o orthologue   |
| YOR330C   | MIP1   | Mitochondrial DNA Polymerase, mitochondrial DNA polymerase gamma subunit                                                 | POLG             |
| YOR344C   | TYE7   | Ty1-mediated Expression, serine-rich protein that contains a bHLH DNA binding motif                                      | SREBF1, USF1     |
| YOR346W   | REV1   | REVersionless, deoxycytidyl transferase                                                                                  | REV1             |
| YOR360C   | PDE2   | PhosphoDiEsterase, high-affinity cyclic AMP phosphodiesterase                                                            | w/o orthologue   |
| YOR364W   | unass. | Dubious open reading frame                                                                                               | w/o orthologue   |
| YOR378W   | AMF1   | AMmonium Facilitator, low affinity NH4 <sup>+</sup> transporter                                                          | w/o orthologue   |
| YPL005W   | AEP3   | ATPase ExPression, peripheral mitochondrial inner membrane protein                                                       | w/o orthologue   |
| YPL013C   | MRPS16 | Mitochondrial Ribosomal Protein, Small subunit                                                                           | MRPS16           |
| YPL065W   | VPS28  | Vacuolar Protein Sorting, component of the ESCRT-I complex                                                               | VPS28            |
| YPL078C   | ATP4   | ATP synthase, subunit b of the stator stalk of mitochondrial F1F0 ATP synthase                                           | ATP5PB           |
| YPL104W   | MSD1   | Mitochondrial aminoacyl-tRNA Synthetase, Aspartate (D)                                                                   | DARS2            |

|           |        |                                                                                             |                  |
|-----------|--------|---------------------------------------------------------------------------------------------|------------------|
| YPL132W   | COX11  | Cytochrome c OXidase, protein required for delivery of copper to Cox1p                      | COX11            |
| YPL189C-A | COA2   | Cytochrome Oxidase Assembly, cytochrome oxidase assembly factor                             | w/o orthologue   |
| YPL216W   | unass. | Putative protein of unknown function                                                        | w/o orthologue   |
| YPL247C   | unass. | Putative protein of unknown function                                                        | DCAF7            |
| YPR023C   | EAF3   | Esa1p-Associated Factor, component of the Rpd3S histone deacetylase complex                 | MORF4L1, MORF4L2 |
| YPR036W   | VMA13  | Subunit H of the V1 peripheral membrane domain of V-ATPase                                  | ATP6V1H          |
| YPR047W   | MSF1   | Mitochondrial aminoacyl-tRNA Synthetase, Phenylalanine (F)                                  | FARS2            |
| YPR060C   | ARO7   | AROMATIC amino acid requiring, chorismate mutase                                            | w/o orthologue   |
| YPR100W   | MRPL51 | Mitochondrial Ribosomal Protein, Large subunit                                              | MRPL43           |
| YPR155C   | NCA2   | Nuclear Control of ATPase, protein that regulates expression of Fo-F1 ATP synthase subunits | w/o orthologue   |
| YPR172W   | unass. | Putative pyridoxal 5'-phosphate synthase                                                    | w/o orthologue   |

*unass.* = *unassigned*

*w/o orthologue* = *without mammalian orthologue*



**Table S3.** Network analysis results of amyloid toxicity activator and protective Genes. Top 10 best results for average shortest path length, degree, and betweenness centrality

| Average Shortest Path Length | Value | Property   | Degree        | Value | Property   | Betweenness Centrality | Value | Property   |
|------------------------------|-------|------------|---------------|-------|------------|------------------------|-------|------------|
| <i>VPS18</i>                 | 6.63  | protective | <i>MRPS7</i>  | 30    | protective | <i>GNB2L1</i>          | 0.33  | enhancer   |
| <i>VPS33A</i>                | 6.63  | protective | <i>MRPS12</i> | 29    | protective | <i>MRPL49</i>          | 0.29  | protective |
| <i>SURF4</i>                 | 6.05  | enhancer   | <i>RPL9</i>   | 28    | protective | <i>HSP90AA1</i>        | 0.25  | enhancer   |
| <i>OSGEPL1</i>               | 5.82  | protective | <i>RPS11</i>  | 28    | enhancer   | <i>HSPA9</i>           | 0.25  | enhancer   |
| <i>USP10</i>                 | 5.72  | enhancer   | <i>MRPL22</i> | 26    | protective | <i>COX5A</i>           | 0.22  | protective |
| <i>RAB5A</i>                 | 5.66  | protective | <i>MRPL3</i>  | 26    | protective | <i>AGXT</i>            | 0.17  | protective |
| <i>ATP5O</i>                 | 5.09  | protective | <i>GFM1</i>   | 25    | protective | <i>TALDO1</i>          | 0.17  | protective |
| <i>SURF1</i>                 | 5.06  | protective | <i>MRPL19</i> | 25    | protective | <i>PEX5</i>            | 0.17  | enhancer   |
| <i>VDAC1</i>                 | 5.05  | protective | <i>MRPL21</i> | 25    | protective | <i>CAT</i>             | 0.17  | protective |
| <i>AHSA1</i>                 | 4.86  | enhancer   | <i>MRPS16</i> | 25    | protective | <i>SORD</i>            | 0.17  | enhancer   |

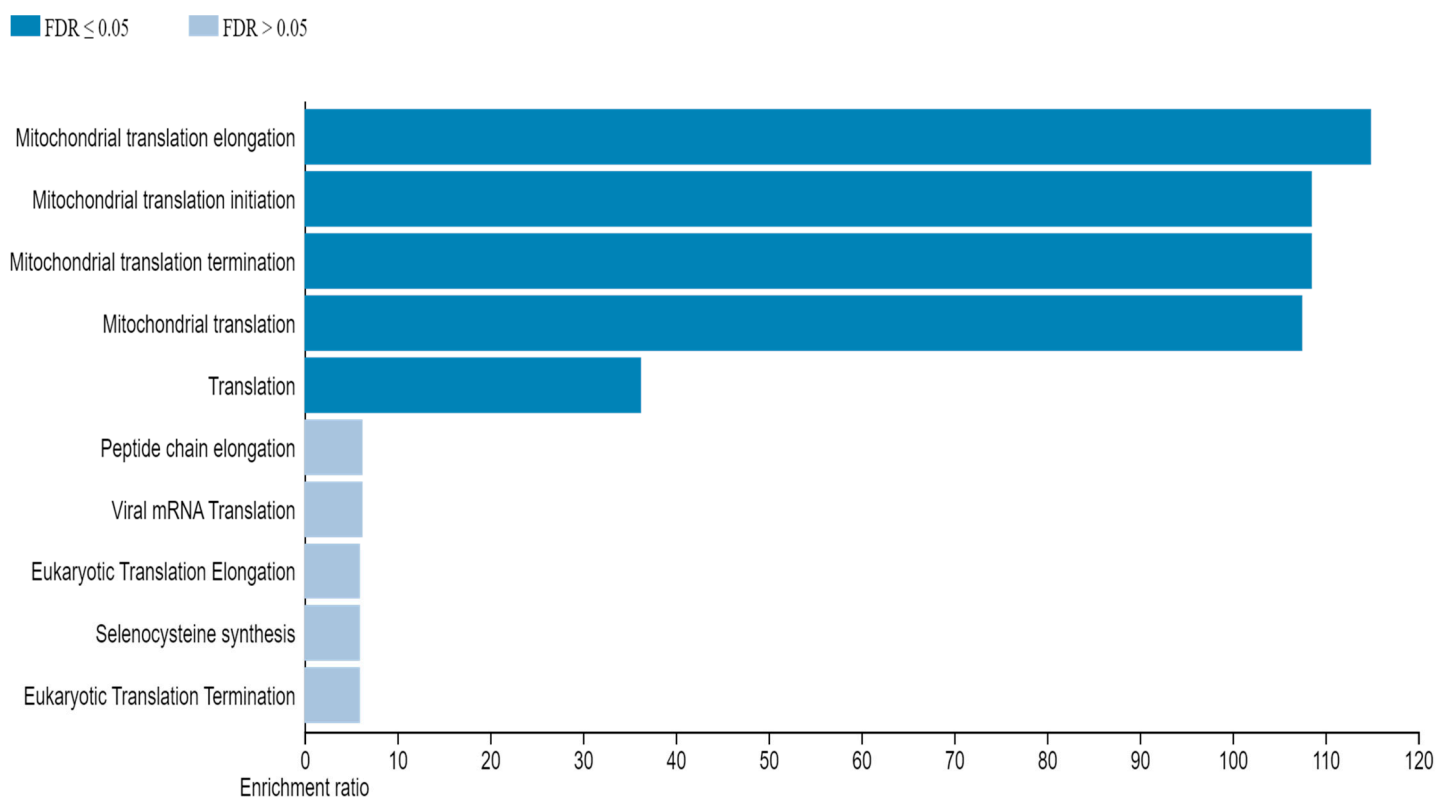

**Figure S7.** The chart demonstrates the Reactome pathways enriched in the genes which form the highest scoring clusters according MCODE (Figure 4 - yellow highlighted genes).

**Table S4.** Text-mining of the amyloid toxicity enhancer yeast genes

| GO term name                                                                                 | Number of genes | Total gene number | Adj. P-value     |
|----------------------------------------------------------------------------------------------|-----------------|-------------------|------------------|
| SCF-dependent proteasomal ubiquitin-dependent protein catabolic process                      | 3               | 19                | 3,40E+06         |
| positive regulation of ubiquitin-dependent protein catabolic process                         | 2               | 10                | 0.00123567025803 |
| protein ubiquitination                                                                       | 3               | 135               | 0.00448291121121 |
| negative regulation of cellular response to tunicamycin                                      | 1               | 1                 | 0.00551631746404 |
| positive regulation of hepatic stellate cell activation                                      | 1               | 1                 | 0.00551631746404 |
| negative regulation of store-operated calcium channel activity                               | 1               | 1                 | 0.00551631746404 |
| positive regulation of neurofibrillary tangle assembly                                       | 1               | 1                 | 0.00551631746404 |
| microglial cell proliferation                                                                | 1               | 1                 | 0.00551631746404 |
| negative regulation of response to endoplasmic reticulum stress                              | 1               | 1                 | 0.00551631746404 |
| positive regulation of protein ubiquitination                                                | 2               | 47                | 0.00551631746404 |
| negative regulation of cellular response to thapsigargin                                     | 1               | 1                 | 0.00551631746404 |
| regulation of neuronal signal transduction                                                   | 1               | 1                 | 0.00551631746404 |
| negative regulation of SREBP signaling pathway                                               | 1               | 1                 | 0.00551631746404 |
| negative regulation of hepatocyte proliferation                                              | 1               | 2                 | 0.00754574460057 |
| negative regulation of triglyceride biosynthetic process                                     | 1               | 2                 | 0.00754574460057 |
| regulation of amyloid-beta clearance                                                         | 1               | 2                 | 0.00754574460057 |
| regulation of oxidative stress-induced intrinsic apoptotic signaling pathway                 | 1               | 2                 | 0.00754574460057 |
| hepatocyte proliferation                                                                     | 1               | 2                 | 0.00754574460057 |
| positive regulation of oxidative stress-induced neuron intrinsic apoptotic signaling pathway | 1               | 2                 | 0.00754574460057 |
| central nervous system myelin maintenance                                                    | 1               | 3                 | 0.00859884385703 |
| protein import                                                                               | 1               | 3                 | 0.00859884385703 |
| negative regulation of osteoclast development                                                | 1               | 3                 | 0.00859884385703 |
| microglial cell activation                                                                   | 1               | 3                 | 0.00859884385703 |
| negative regulation of amyloid fibril formation                                              | 1               | 3                 | 0.00859884385703 |
| response to misfolded protein                                                                | 1               | 3                 | 0.00859884385703 |

**Table S5.** Text-mining of the amyloid toxicity protective yeast genes

| GO ID   | GO term name                                                                         | Number of genes | Total gene number | Adj. P-value      |
|---------|--------------------------------------------------------------------------------------|-----------------|-------------------|-------------------|
| 0051403 | stress-activated MAPK cascade                                                        | 3               | 10                | 9,21E+04          |
| 0070849 | response to epidermal growth factor                                                  | 2               | 3                 | 3,00E+06          |
| 1903351 | cellular response to dopamine                                                        | 2               | 7                 | 0.000139883410432 |
| 0018105 | peptidyl-serine phosphorylation                                                      | 3               | 81                | 0.000161554822097 |
| 1904355 | positive regulation of telomere capping                                              | 2               | 16                | 0.000478494983168 |
| 0071276 | cellular response to cadmium ion                                                     | 2               | 21                | 0.000696910906528 |
| 0016310 | phosphorylation                                                                      | 2               | 25                | 0.000745924397294 |
| 0034614 | cellular response to reactive oxygen species                                         | 2               | 24                | 0.000745924397294 |
| 0034198 | cellular response to amino acid starvation                                           | 2               | 32                | 0.000895307729786 |
| 0032212 | positive regulation of telomere maintenance via telomerase                           | 2               | 30                | 0.000895307729786 |
| 0051973 | positive regulation of telomerase activity                                           | 2               | 31                | 0.000895307729786 |
| 0018107 | peptidyl-threonine phosphorylation                                                   | 2               | 40                | 0.00128796663344  |
| 0072709 | cellular response to sorbitol                                                        | 1               | 1                 | 0.00278982126847  |
| 0072740 | cellular response to anisomycin                                                      | 1               | 1                 | 0.00278982126847  |
| 0035408 | histone H3-T6 phosphorylation                                                        | 1               | 2                 | 0.00520633243682  |
| 0031281 | positive regulation of cyclase activity                                              | 1               | 3                 | 0.00688896906305  |
| 0050861 | positive regulation of B cell receptor signaling pathway                             | 1               | 3                 | 0.00688896906305  |
| 0010829 | negative regulation of glucose transmembrane transport                               | 1               | 4                 | 0.00821631410542  |
| 0038127 | ERBB signaling pathway                                                               | 1               | 4                 | 0.00821631410542  |
| 0033129 | positive regulation of histone phosphorylation                                       | 1               | 5                 | 0.00886761254667  |
| 1903936 | cellular response to sodium arsenite                                                 | 1               | 5                 | 0.00886761254667  |
| 0048709 | oligodendrocyte differentiation                                                      | 1               | 5                 | 0.00886761254667  |
| 0006975 | DNA damage induced protein phosphorylation                                           | 1               | 6                 | 0.0093618002335   |
| 0030949 | positive regulation of vascular endothelial growth factor receptor signaling pathway | 1               | 6                 | 0.0093618002335   |
| 0035094 | response to nicotine                                                                 | 1               | 6                 | 0.0093618002335   |
| 0042113 | B cell activation                                                                    | 1               | 7                 | 0.00974937732528  |
| 0006970 | response to osmotic stress                                                           | 1               | 7                 | 0.00974937732528  |
| 0051966 | regulation of synaptic transmission, glutamatergic                                   | 1               | 7                 | 0.00974937732528  |



**Table S6.** Primer sequences used for experiments

| <b>qPCR primer</b> | <b>Sequence (5'-3')</b> |
|--------------------|-------------------------|
| hSURF4-Forward     | CTATTGTCCAGAACATCGTG    |
| hSURF4-Reverse     | CCAGAAGGCGTTGAAATAT     |
| hGAPDH-Forward     | GGAGTCCACTGGCGTCTTC     |
| hGAPDH-Reverse     | TGGCTCCCCCCTGCAAATG     |
| hHPRT-Forward      | TGACACTGGCAAAACAATGCA   |
| hHPRT-Reverse      | GGTCCTTTTCACCAGCAAGCT   |

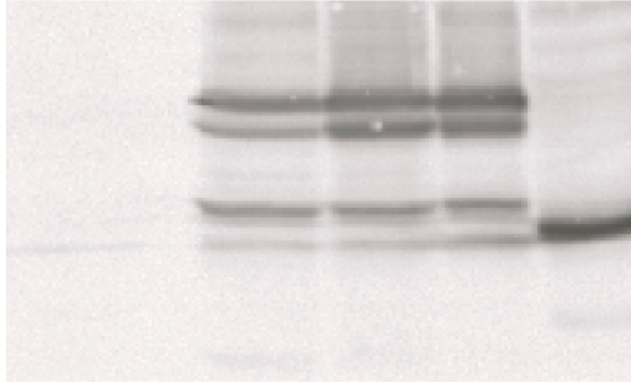

**Figure S8.** Uncropped western blot images showed in Figure 2B.
